# Supplementary material for: Protein interaction networks at the host–microbe interface in Diaphorina citri, the insect vector of the citrus greening pathogen
Source: R Soc Open Sci. 2017 Feb 8;4(2):160545. doi: 10.1098/rsos.160545 (PMC5367280; doi:10.1098/rsos.160545)
Supplement: Table S5. Annotation of reported PIR crosslinks. Search engine output: react2 data files for each crosslink are listed in the two rightmost columns. React2 files and the corresponding mzXML files have been uploaded to ProteomeXchange as part of this publication. [file rsos160545supp6.xlsx]

## Sheet: Table S5
Ramsey JS et al 2017, Royal Society Open Science supplementary material: Protein interaction networks at the host-microbe interface in Diaphorina citri, the insect vector of the citrus greening pathogen.
Table S5. Annotation of reported PIR crosslinks. Search engine output: react2 data files for each crosslink are listed in the two rightmost columns. React2 files and the corresponding mzXML files have been uploaded to ProteomeXchange as part of this publication.
ms2 scan	ms2 query mass	ms2 prec mass	ms2 mass1	ms2 mass2	ms3 mass1	ms3 mass2	relationship error	ms3 pep1	ms3 pep2	ms3 fdr1	ms3 fdr2	ms3 pep1 plain	ms3 pep2 plain	ms3 scan1	ms3 scan2	ms3 prot1	ms3 prot2	ms3 descr1	ms3 descr2	mod_pos1	#times_in_prot1	mod_pos2	#times_in_prot2	xlinked_peptide_small_large	react2 file ID 1	react2 file ID 2
12498	4568.34	4568.35	1765.84	2051.1	1764.83	2050.06	2.0453	LGK[325.13]IVGWMQSYMR	ADLILSKGEDHSVK[325.13]TIK	0	0.040144	LGKIVGWMQSYMR	ADLILSKGEDHSVKTIK	12501	12502	gi|662204082|ref|XP_008475404.1| +1	gi|594437402|gb|EXU78401.1| +1	myosin heavy chain, muscle-like [D. citri]	pantothenate kinase [ CLas]	116	1	304	1	LGK[325.13]IVGWMQSYMR_ADLILSKGEDHSVK[325.13]TIK	060215_CLasBDP_percoll_3_4_2.pep.xml.react2.xls
10426	4067.04	4067.01	1165.6	2150.03	1165.6	2150.03	0.0025	FLK[325.13]ASYLK	YPYDTLLFPNANLK[325.13]ER	0.015434	0	FLKASYLK	YPYDTLLFPNANLKER	10427	10430	gi|527324458|ref|YP_008350653.1|	gi|662220122|ref|XP_008484178.1| +2	imidazoleglycerol phosphate synthase, cyclase subunit [ Carsonella ruddii DC]	uncharacterized protein LOC103520858 [D. citri]	232	1	1482	1	FLK[325.13]ASYLK_YPYDTLLFPNANLK[325.13]ER	060215_CLasBDP_percoll_5_6_3.pep.xml.react2.xls
12369	3206.67	3207.65	1090.61	1364.66	1090.61	1364.64	0.0143	IK[325.13]FFVIK	MVYPDFK[325.13]LR	0.047431	0.001221	IKFFVIK	MVYPDFKLR	12372	12373	gi|527135683|gb|AGS06534.1| +1	gi|662204082|ref|XP_008475404.1|	anthranilate synthase component I [ Carsonella ruddii DC]	myosin heavy chain, muscle-like [D. citri]	144	1	54	1	IK[325.13]FFVIK_MVYPDFK[325.13]LR	101814_CLasBDP004_F10_4hr_1.pep.xml.react2.xls
6127	4738.32	4738.31	1840.85	2146.06	1839.85	2145.05	2.0105	FNQNGK[325.13]PLNAEQQR	QNMVLLDK[325.13]FATQLQSGR	0	0	FNQNGKPLNAEQQR	QNMVLLDKFATQLQSGR	6130	6131	gi|662208685|ref|XP_008477906.1| +1	gi|662208685|ref|XP_008477906.1|	PREDICTED: allergen Cr-PI-like [Diaphorina citri]	PREDICTED: allergen Cr-PI-like [Diaphorina citri]	825	1	841	1	FNQNGK[325.13]PLNAEQQR_QNMVLLDK[325.13]FATQLQSGR	101814_CLasBDP004_F9_2.pep.xml.react2.xls
6200	4741.3	4742.3	1842.84	2147.06	1841.84	2145.05	3.0034	YAAENLEVK[325.13]QKR	QNMVLLDK[325.13]FATQLQSGR	0.0481	0	YAAENLEVKQKR	QNMVLLDKFATQLQSGR	6201	6204	gi|662214792|ref|XP_008481243.1|	gi|662208685|ref|XP_008477906.1|	PREDICTED: transcription factor E2F4 [Diaphorina citri]	PREDICTED: allergen Cr-PI-like [Diaphorina citri]	45	1	841	1	YAAENLEVK[325.13]QKR_QNMVLLDK[325.13]FATQLQSGR	101814_CLasBDP004_F9_2.pep.xml.react2.xls
11087	4736.31	4737.29	1839.85	2145.05	1839.85	2145.05	0.0024	FNQNGK[325.13]PLNAEQQR	QNMVLLDK[325.13]FATQLQSGR	0	0	FNQNGKPLNAEQQR	QNMVLLDKFATQLQSGR	11090	11091	gi|662208685|ref|XP_008477906.1| +1	gi|662208685|ref|XP_008477906.1|	PREDICTED: allergen Cr-PI-like [Diaphorina citri]	PREDICTED: allergen Cr-PI-like [Diaphorina citri]	825	1	841	1	FNQNGK[325.13]PLNAEQQR_QNMVLLDK[325.13]FATQLQSGR	101814_CLasBDP004_F9_2.pep.xml.react2.xls
11164	4738.32	4739.31	1841.86	2145.05	1839.85	2145.05	2.0089	FNQNGK[325.13]PLNAEQQR	QNMVLLDK[325.13]FATQLQSGR	0	0	FNQNGKPLNAEQQR	QNMVLLDKFATQLQSGR	11167	11168	gi|662208685|ref|XP_008477906.1| +1	gi|662208685|ref|XP_008477906.1|	PREDICTED: allergen Cr-PI-like [Diaphorina citri]	PREDICTED: allergen Cr-PI-like [Diaphorina citri]	825	1	841	1	FNQNGK[325.13]PLNAEQQR_QNMVLLDK[325.13]FATQLQSGR	101814_CLasBDP004_F9_2.pep.xml.react2.xls
11239	4738.3	4738.3	1840.83	2146.06	1841.84	2145.05	-0.0046	YAAENLEVK[325.13]QKR	QNMVLLDK[325.13]FATQLQSGR	0.033989	0	YAAENLEVKQKR	QNMVLLDKFATQLQSGR	11242	11243	gi|662214792|ref|XP_008481243.1|	gi|662208685|ref|XP_008477906.1|	PREDICTED: transcription factor E2F4 [Diaphorina citri]	PREDICTED: allergen Cr-PI-like [Diaphorina citri]	45	1	841	1	YAAENLEVK[325.13]QKR_QNMVLLDK[325.13]FATQLQSGR	101814_CLasBDP004_F9_2.pep.xml.react2.xls
13560	6680.25	6680.21	2760.25	3168.59	2759.24	3167.57	2.0361	TK[325.13]QANNNNNENNNVGNSFVETIK	K[325.13]LGLAPSALENYQTMLRDPTFYMIAK	0	0	TKQANNNNNENNNVGNSFVETIK	KLGLAPSALENYQTMLRDPTFYMIAK	13561	13564	gi|662208685|ref|XP_008477906.1|	gi|662208685|ref|XP_008477906.1|	PREDICTED: allergen Cr-PI-like [Diaphorina citri]	PREDICTED: allergen Cr-PI-like [Diaphorina citri]	436	1	527	1	TK[325.13]QANNNNNENNNVGNSFVETIK_K[325.13]LGLAPSALENYQTMLRDPTFYMIAK	101814_CLasBDP004_F9_4hr_1.pep.xml.react2.xls
3233	4433.1	4433.12	1840.85	1840.85	1839.85	1839.85	1.9982	FNQNGK[325.13]PLNAEQQR	FNQNGK[325.13]PLNAEQQR	0	0	FNQNGKPLNAEQQR	FNQNGKPLNAEQQR	3237	3236	gi|662208685|ref|XP_008477906.1| +1	gi|662208685|ref|XP_008477906.1| +1	PREDICTED: allergen Cr-PI-like [Diaphorina citri]	PREDICTED: allergen Cr-PI-like [Diaphorina citri]	825	1	825	1	FNQNGK[325.13]PLNAEQQR_FNQNGK[325.13]PLNAEQQR	101814_CLasBDP004_F10_1.pep.xml.react2.xls
7070	5760.83	5760.83	1840.86	3168.57	1839.85	3167.57	2.0127	FNQNGK[325.13]PLNAEQQR	K[325.13]LGLAPSALENYQTMLRDPTFYMIAK	0	0	FNQNGKPLNAEQQR	KLGLAPSALENYQTMLRDPTFYMIAK	7073	7074	gi|662208685|ref|XP_008477906.1| +1	gi|662208685|ref|XP_008477906.1|	PREDICTED: allergen Cr-PI-like [Diaphorina citri]	PREDICTED: allergen Cr-PI-like [Diaphorina citri]	825	1	527	1	FNQNGK[325.13]PLNAEQQR_K[325.13]LGLAPSALENYQTMLRDPTFYMIAK	101814_CLasBDP004_F10_1.pep.xml.react2.xls
7197	5760.82	5761.78	1840.84	3168.58	1839.85	3167.57	1.9961	FNQNGK[325.13]PLNAEQQR	K[325.13]LGLAPSALENYQTMLRDPTFYMIAK	0.024664	0.004914	FNQNGKPLNAEQQR	KLGLAPSALENYQTMLRDPTFYMIAK	7200	7201	gi|662208685|ref|XP_008477906.1| +1	gi|662208685|ref|XP_008477906.1|	PREDICTED: allergen Cr-PI-like [Diaphorina citri]	PREDICTED: allergen Cr-PI-like [Diaphorina citri]	825	1	527	1	FNQNGK[325.13]PLNAEQQR_K[325.13]LGLAPSALENYQTMLRDPTFYMIAK	101814_CLasBDP004_F10_1.pep.xml.react2.xls
5130	4434.09	4434.09	1841.84	1840.84	1839.85	1839.85	2.9865	FNQNGK[325.13]PLNAEQQR	FNQNGK[325.13]PLNAEQQR	0	0	FNQNGKPLNAEQQR	FNQNGKPLNAEQQR	5132	5133	gi|662208685|ref|XP_008477906.1| +1	gi|662208685|ref|XP_008477906.1| +1	PREDICTED: allergen Cr-PI-like [Diaphorina citri]	PREDICTED: allergen Cr-PI-like [Diaphorina citri]	825	1	825	1	FNQNGK[325.13]PLNAEQQR_FNQNGK[325.13]PLNAEQQR	101814_CLasBDP004_F10_1.pep.xml.react2.xls
11217	3886.87	3886.88	989.406	2146.05	989.406	2145.05	1.0018	MNK[325.13]MNR	QNMVLLDK[325.13]FATQLQSGR	0.0023202	0	MNKMNR	QNMVLLDKFATQLQSGR	11220	11221	gi|662224569|ref|XP_008486634.1|	gi|662208685|ref|XP_008477906.1|	PREDICTED: putative uncharacterized protein DDB_G0286901, partial [Diaphorina citri]	PREDICTED: allergen Cr-PI-like [Diaphorina citri]	3	1	841	1	MNK[325.13]MNR_QNMVLLDK[325.13]FATQLQSGR	101814_CLasBDP004_F10_4hr_1.pep.xml.react2.xls
4596	5578.59	5578.59	1841.84	2985.35	1839.85	2984.35	2.9881	FNQNGK[325.13]PLNAEQQR	EQNEFNTPNVNQHNALQK[325.13]YLC[160.03]AR	0.0062112	0.0035842	FNQNGKPLNAEQQR	EQNEFNTPNVNQHNALQKYLCAR	4599	4600	gi|662208685|ref|XP_008477906.1| +1	gi|662208685|ref|XP_008477906.1|	PREDICTED: allergen Cr-PI-like [Diaphorina citri]	PREDICTED: allergen Cr-PI-like [Diaphorina citri]	825	1	979	1	FNQNGK[325.13]PLNAEQQR_EQNEFNTPNVNQHNALQK[325.13]YLC[160.03]AR	101814_CLasBDP004_F11_1.pep.xml.react2.xls
4602	5578.6	5578.59	1840.84	2986.36	1839.85	2984.35	2.998	FNQNGK[325.13]PLNAEQQR	EQNEFNTPNVNQHNALQK[325.13]YLC[160.03]AR	0.011869	0	FNQNGKPLNAEQQR	EQNEFNTPNVNQHNALQKYLCAR	4605	4606	gi|662208685|ref|XP_008477906.1| +1	gi|662208685|ref|XP_008477906.1|	PREDICTED: allergen Cr-PI-like [Diaphorina citri]	PREDICTED: allergen Cr-PI-like [Diaphorina citri]	825	1	979	1	FNQNGK[325.13]PLNAEQQR_EQNEFNTPNVNQHNALQK[325.13]YLC[160.03]AR	101814_CLasBDP004_F11_1.pep.xml.react2.xls
6624	5881.82	5881.81	2146.06	2984.35	2145.05	2984.35	1.0137	QNMVLLDK[325.13]FATQLQSGR	EQNEFNTPNVNQHNALQK[325.13]YLC[160.03]AR	0	0	QNMVLLDKFATQLQSGR	EQNEFNTPNVNQHNALQKYLCAR	6627	6628	gi|662208685|ref|XP_008477906.1|	gi|662208685|ref|XP_008477906.1|	PREDICTED: allergen Cr-PI-like [Diaphorina citri]	PREDICTED: allergen Cr-PI-like [Diaphorina citri]	841	1	979	1	QNMVLLDK[325.13]FATQLQSGR_EQNEFNTPNVNQHNALQK[325.13]YLC[160.03]AR	101814_CLasBDP004_F11_1.pep.xml.react2.xls
7019	5789.84	5789.84	1839.85	3198.58	1839.85	3195.57	3.0076	FNQNGK[325.13]PLNAEQQR	LGLAPSALENYQTMLRDPTFYMIAK[325.13]R	0	0	FNQNGKPLNAEQQR	LGLAPSALENYQTMLRDPTFYMIAKR	7022	7023	gi|662208685|ref|XP_008477906.1| +1	gi|662208685|ref|XP_008477906.1|	PREDICTED: allergen Cr-PI-like [Diaphorina citri]	PREDICTED: allergen Cr-PI-like [Diaphorina citri]	825	1	552	1	FNQNGK[325.13]PLNAEQQR_LGLAPSALENYQTMLRDPTFYMIAK[325.13]R	101814_CLasBDP004_F11_1.pep.xml.react2.xls
8001	5576.61	5576.62	1839.85	2985.35	1839.85	2984.35	1.0047	FNQNGK[325.13]PLNAEQQR	EQNEFNTPNVNQHNALQK[325.13]YLC[160.03]AR	0	0	FNQNGKPLNAEQQR	EQNEFNTPNVNQHNALQKYLCAR	8004	8003	gi|662208685|ref|XP_008477906.1| +1	gi|662208685|ref|XP_008477906.1|	PREDICTED: allergen Cr-PI-like [Diaphorina citri]	PREDICTED: allergen Cr-PI-like [Diaphorina citri]	825	1	979	1	FNQNGK[325.13]PLNAEQQR_EQNEFNTPNVNQHNALQK[325.13]YLC[160.03]AR	101814_CLasBDP004_F11_1.pep.xml.react2.xls
11117	6936.26	6937.22	1839.85	4345	1839.85	4342.99	2.0145	FNQNGK[325.13]PLNAEQQR	SNIFPFDRPLK[325.13]QQNEFNTPNVNQNNAFQQYFC[160.03]AR	0	0	FNQNGKPLNAEQQR	SNIFPFDRPLKQQNEFNTPNVNQNNAFQQYFCAR	11120	11121	gi|662208685|ref|XP_008477906.1| +1	gi|662208689|ref|XP_008477908.1|	PREDICTED: allergen Cr-PI-like [Diaphorina citri]	PREDICTED: probable cyclin-dependent serine/threonine-protein kinase DDB_G0292550, partial [Diaphorina citri]	825	1	212	2	FNQNGK[325.13]PLNAEQQR_SNIFPFDRPLK[325.13]QQNEFNTPNVNQNNAFQQYFC[160.03]AR	101814_CLasBDP004_F11_4hr_1.pep.xml.react2.xls
12325	5882.82	5882.8	2146.06	2985.35	2145.05	2984.35	2.0115	QNMVLLDK[325.13]FATQLQSGR	EQNEFNTPNVNQHNALQK[325.13]YLC[160.03]AR	0	0.010225	QNMVLLDKFATQLQSGR	EQNEFNTPNVNQHNALQKYLCAR	12328	12327	gi|662208685|ref|XP_008477906.1|	gi|662208685|ref|XP_008477906.1|	PREDICTED: allergen Cr-PI-like [Diaphorina citri]	PREDICTED: allergen Cr-PI-like [Diaphorina citri]	841	1	979	1	QNMVLLDK[325.13]FATQLQSGR_EQNEFNTPNVNQHNALQK[325.13]YLC[160.03]AR	101814_CLasBDP004_F11_1.pep.xml.react2.xls
13029	5788.84	5788.81	1839.85	3197.58	1839.85	3195.57	2.0143	FNQNGK[325.13]PLNAEQQR	LGLAPSALENYQTMLRDPTFYMIAK[325.13]R	0	0.016216	FNQNGKPLNAEQQR	LGLAPSALENYQTMLRDPTFYMIAKR	13030	13031	gi|662208685|ref|XP_008477906.1| +1	gi|662208685|ref|XP_008477906.1|	PREDICTED: allergen Cr-PI-like [Diaphorina citri]	PREDICTED: allergen Cr-PI-like [Diaphorina citri]	825	1	552	1	FNQNGK[325.13]PLNAEQQR_LGLAPSALENYQTMLRDPTFYMIAK[325.13]R	101814_CLasBDP004_F11_1.pep.xml.react2.xls
3427	3966.87	3967.87	1374.63	1840.83	1374.63	1839.85	0.981	LNHK[325.13]SFNYR	FNQNGK[325.13]PLNAEQQR	0	0	LNHKSFNYR	FNQNGKPLNAEQQR	3430	3431	gi|662208685|ref|XP_008477906.1|	gi|662208685|ref|XP_008477906.1| +1	PREDICTED: allergen Cr-PI-like [Diaphorina citri]	PREDICTED: allergen Cr-PI-like [Diaphorina citri]	794	1	825	1	LNHK[325.13]SFNYR_FNQNGK[325.13]PLNAEQQR	101814_CLasBDP004_F121314_1.pep.xml.react2.xls
5301	5201.39	5201.39	1259.57	3190.41	1259.57	3188.42	1.991	NYK[325.13]AFQHR	QAMNGNQPFLYNLNK[325.13]M[147.04]NNNAPC[160.03]GIPR	0	0	NYKAFQHR	QAMNGNQPFLYNLNKMNNNAPCGIPR	5304	5305	gi|662208685|ref|XP_008477906.1|	gi|662208685|ref|XP_008477906.1|	PREDICTED: allergen Cr-PI-like [Diaphorina citri]	PREDICTED: allergen Cr-PI-like [Diaphorina citri]	785	1	893	1	NYK[325.13]AFQHR_QAMNGNQPFLYNLNK[325.13]M[147.04]NNNAPC[160.03]GIPR	101814_CLasBDP004_F121314_1.pep.xml.react2.xls
5315	5316.46	5316.47	1374.64	3190.42	1374.63	3188.42	2.0041	LNHK[325.13]SFNYR	QAM[147.04]NGNQPFLYNLNK[325.13]MNNNAPC[160.03]GIPR	0	0.023077	LNHKSFNYR	QAMNGNQPFLYNLNKMNNNAPCGIPR	5318	5319	gi|662208685|ref|XP_008477906.1|	gi|662208685|ref|XP_008477906.1|	PREDICTED: allergen Cr-PI-like [Diaphorina citri]	PREDICTED: allergen Cr-PI-like [Diaphorina citri]	794	1	893	1	LNHK[325.13]SFNYR_QAM[147.04]NGNQPFLYNLNK[325.13]MNNNAPC[160.03]GIPR	101814_CLasBDP004_F121314_1.pep.xml.react2.xls
5333	5316.46	5317.43	1374.63	3190.42	1374.63	3188.42	1.9997	LNHK[325.13]SFNYR	QAMNGNQPFLYNLNK[325.13]M[147.04]NNNAPC[160.03]GIPR	0	0.021773	LNHKSFNYR	QAMNGNQPFLYNLNKMNNNAPCGIPR	5336	5337	gi|662208685|ref|XP_008477906.1|	gi|662208685|ref|XP_008477906.1|	PREDICTED: allergen Cr-PI-like [Diaphorina citri]	PREDICTED: allergen Cr-PI-like [Diaphorina citri]	794	1	893	1	LNHK[325.13]SFNYR_QAMNGNQPFLYNLNK[325.13]M[147.04]NNNAPC[160.03]GIPR	101814_CLasBDP004_F121314_1.pep.xml.react2.xls
5395	5300.47	5300.45	1374.63	3174.43	1374.63	3172.43	2.0057	LNHK[325.13]SFNYR	QAMNGNQPFLYNLNK[325.13]MNNNAPC[160.03]GIPR	0	0	LNHKSFNYR	QAMNGNQPFLYNLNKMNNNAPCGIPR	5398	5399	gi|662208685|ref|XP_008477906.1|	gi|662208685|ref|XP_008477906.1|	PREDICTED: allergen Cr-PI-like [Diaphorina citri]	PREDICTED: allergen Cr-PI-like [Diaphorina citri]	794	1	893	1	LNHK[325.13]SFNYR_QAMNGNQPFLYNLNK[325.13]MNNNAPC[160.03]GIPR	101814_CLasBDP004_F121314_1.pep.xml.react2.xls
5407	5185.41	5185.42	1259.57	3174.44	1259.57	3172.43	2.0128	NYK[325.13]AFQHR	QAMNGNQPFLYNLNK[325.13]MNNNAPC[160.03]GIPR	0.0017212	0	NYKAFQHR	QAMNGNQPFLYNLNKMNNNAPCGIPR	5408	5411	gi|662208685|ref|XP_008477906.1|	gi|662208685|ref|XP_008477906.1|	PREDICTED: allergen Cr-PI-like [Diaphorina citri]	PREDICTED: allergen Cr-PI-like [Diaphorina citri]	785	1	893	1	NYK[325.13]AFQHR_QAMNGNQPFLYNLNK[325.13]MNNNAPC[160.03]GIPR	101814_CLasBDP004_F121314_1.pep.xml.react2.xls	060215_CLasBDP_percoll_5_6_1.pep.xml.react2.xls
5413	5185.41	5185.41	1259.57	3174.43	1259.57	3172.43	2.0045	NYK[325.13]AFQHR	QAMNGNQPFLYNLNK[325.13]MNNNAPC[160.03]GIPR	0	0	NYKAFQHR	QAMNGNQPFLYNLNKMNNNAPCGIPR	5416	5417	gi|662208685|ref|XP_008477906.1|	gi|662208685|ref|XP_008477906.1|	PREDICTED: allergen Cr-PI-like [Diaphorina citri]	PREDICTED: allergen Cr-PI-like [Diaphorina citri]	785	1	893	1	NYK[325.13]AFQHR_QAMNGNQPFLYNLNK[325.13]MNNNAPC[160.03]GIPR	101814_CLasBDP004_F121314_1.pep.xml.react2.xls	060215_CLasBDP_percoll_5_6_1.pep.xml.react2.xls
5495	5301.46	5302.44	1374.63	3175.42	1374.63	3172.43	2.9938	LNHK[325.13]SFNYR	QAMNGNQPFLYNLNK[325.13]MNNNAPC[160.03]GIPR	0	0.011628	LNHKSFNYR	QAMNGNQPFLYNLNKMNNNAPCGIPR	5498	5497	gi|662208685|ref|XP_008477906.1|	gi|662208685|ref|XP_008477906.1|	PREDICTED: allergen Cr-PI-like [Diaphorina citri]	PREDICTED: allergen Cr-PI-like [Diaphorina citri]	794	1	893	1	LNHK[325.13]SFNYR_QAMNGNQPFLYNLNK[325.13]MNNNAPC[160.03]GIPR	101814_CLasBDP004_F121314_1.pep.xml.react2.xls
5507	5186.39	5187.39	1259.57	3175.42	1259.57	3172.43	2.9927	NYK[325.13]AFQHR	QAMNGNQPFLYNLNK[325.13]MNNNAPC[160.03]GIPR	0	0	NYKAFQHR	QAMNGNQPFLYNLNKMNNNAPCGIPR	5510	5509	gi|662208685|ref|XP_008477906.1|	gi|662208685|ref|XP_008477906.1|	PREDICTED: allergen Cr-PI-like [Diaphorina citri]	PREDICTED: allergen Cr-PI-like [Diaphorina citri]	785	1	893	1	NYK[325.13]AFQHR_QAMNGNQPFLYNLNK[325.13]MNNNAPC[160.03]GIPR	101814_CLasBDP004_F121314_1.pep.xml.react2.xls	060215_CLasBDP_percoll_5_6_1.pep.xml.react2.xls
5829	4289.09	4290.08	1374.63	2163.05	1374.63	2161.05	2.0017	LNHK[325.13]SFNYR	QNM[147.04]VLLDK[325.13]FATQLQSGR	0	0	LNHKSFNYR	QNMVLLDKFATQLQSGR	5832	5833	gi|662208685|ref|XP_008477906.1|	gi|662208685|ref|XP_008477906.1|	PREDICTED: allergen Cr-PI-like [Diaphorina citri]	PREDICTED: allergen Cr-PI-like [Diaphorina citri]	794	1	841	1	LNHK[325.13]SFNYR_QNM[147.04]VLLDK[325.13]FATQLQSGR	101814_CLasBDP004_F121314_1.pep.xml.react2.xls
6510	4272.09	4272.08	1374.63	2146.06	1374.63	2145.05	1.0039	LNHK[325.13]SFNYR	QNMVLLDK[325.13]FATQLQSGR	0	0	LNHKSFNYR	QNMVLLDKFATQLQSGR	6513	6514	gi|662208685|ref|XP_008477906.1|	gi|662208685|ref|XP_008477906.1|	PREDICTED: allergen Cr-PI-like [Diaphorina citri]	PREDICTED: allergen Cr-PI-like [Diaphorina citri]	794	1	841	1	LNHK[325.13]SFNYR_QNMVLLDK[325.13]FATQLQSGR	101814_CLasBDP004_F121314_1.pep.xml.react2.xls
6518	4273.09	4273.09	1375.64	2146.05	1374.63	2145.05	2.0055	LNHK[325.13]SFNYR	QNMVLLDK[325.13]FATQLQSGR	0.0017212	0	LNHKSFNYR	QNMVLLDKFATQLQSGR	6521	6522	gi|662208685|ref|XP_008477906.1|	gi|662208685|ref|XP_008477906.1|	PREDICTED: allergen Cr-PI-like [Diaphorina citri]	PREDICTED: allergen Cr-PI-like [Diaphorina citri]	794	1	841	1	LNHK[325.13]SFNYR_QNMVLLDK[325.13]FATQLQSGR	101814_CLasBDP004_F121314_1.pep.xml.react2.xls
6564	4158.03	4158.04	1259.57	2147.06	1259.57	2145.05	2.0036	NYK[325.13]AFQHR	QNMVLLDK[325.13]FATQLQSGR	0	0	NYKAFQHR	QNMVLLDKFATQLQSGR	6567	6568	gi|662208685|ref|XP_008477906.1|	gi|662208685|ref|XP_008477906.1|	PREDICTED: allergen Cr-PI-like [Diaphorina citri]	PREDICTED: allergen Cr-PI-like [Diaphorina citri]	785	1	841	1	NYK[325.13]AFQHR_QNMVLLDK[325.13]FATQLQSGR	101814_CLasBDP004_F121314_1.pep.xml.react2.xls
6572	4156.03	4156.03	1259.57	2145.05	1259.57	2145.05	0.0012	NYK[325.13]AFQHR	QNMVLLDK[325.13]FATQLQSGR	0	0	NYKAFQHR	QNMVLLDKFATQLQSGR	6575	6576	gi|662208685|ref|XP_008477906.1|	gi|662208685|ref|XP_008477906.1|	PREDICTED: allergen Cr-PI-like [Diaphorina citri]	PREDICTED: allergen Cr-PI-like [Diaphorina citri]	785	1	841	1	NYK[325.13]AFQHR_QNMVLLDK[325.13]FATQLQSGR	101814_CLasBDP004_F121314_1.pep.xml.react2.xls
7262	4759.29	4759.28	1259.57	2748.32	1259.57	2746.29	2.0259	NYK[325.13]AFQHR	FNGVQVESFVVSPLMTYK[325.13]EYGR	0	0	NYKAFQHR	FNGVQVESFVVSPLMTYKEYGR	7265	7266	gi|662208685|ref|XP_008477906.1|	gi|662208685|ref|XP_008477906.1|	PREDICTED: allergen Cr-PI-like [Diaphorina citri]	PREDICTED: allergen Cr-PI-like [Diaphorina citri]	785	1	593	1	NYK[325.13]AFQHR_FNGVQVESFVVSPLMTYK[325.13]EYGR	101814_CLasBDP004_F121314_1.pep.xml.react2.xls
7308	4874.33	4874.35	1375.64	2747.29	1374.63	2746.29	2.0024	LNHK[325.13]SFNYR	FNGVQVESFVVSPLMTYK[325.13]EYGR	0.0017212	0	LNHKSFNYR	FNGVQVESFVVSPLMTYKEYGR	7311	7310	gi|662208685|ref|XP_008477906.1|	gi|662208685|ref|XP_008477906.1|	PREDICTED: allergen Cr-PI-like [Diaphorina citri]	PREDICTED: allergen Cr-PI-like [Diaphorina citri]	794	1	593	1	LNHK[325.13]SFNYR_FNGVQVESFVVSPLMTYK[325.13]EYGR	101814_CLasBDP004_F121314_1.pep.xml.react2.xls
4701	3852.81	3852.81	1259.57	1841.84	1259.57	1839.85	1.9894	NYK[325.13]AFQHR	FNQNGK[325.13]PLNAEQQR	0	0.034113	NYKAFQHR	FNQNGKPLNAEQQR	4704	4705	gi|662208685|ref|XP_008477906.1|	gi|662208685|ref|XP_008477906.1| +1	PREDICTED: allergen Cr-PI-like [Diaphorina citri]	PREDICTED: allergen Cr-PI-like [Diaphorina citri]	785	1	825	1	NYK[325.13]AFQHR_FNQNGK[325.13]PLNAEQQR	101814_CLasBDP004_F121314_4hr_1.pep.xml.react2.xls
4887	3966.87	3966.88	1374.63	1840.83	1374.63	1839.85	0.9852	LNHK[325.13]SFNYR	FNQNGK[325.13]PLNAEQQR	0	0.030242	LNHKSFNYR	FNQNGKPLNAEQQR	4890	4891	gi|662208685|ref|XP_008477906.1|	gi|662208685|ref|XP_008477906.1| +1	PREDICTED: allergen Cr-PI-like [Diaphorina citri]	PREDICTED: allergen Cr-PI-like [Diaphorina citri]	794	1	825	1	LNHK[325.13]SFNYR_FNQNGK[325.13]PLNAEQQR	101814_CLasBDP004_F121314_1.pep.xml.react2.xls
4911	3968.88	3968.88	1375.64	1841.84	1374.63	1841.84	0.9978	LNHK[325.13]SFNYR	YAAENLEVK[325.13]QKR	0	0.0047393	LNHKSFNYR	YAAENLEVKQKR	4912	4913	gi|662208685|ref|XP_008477906.1|	gi|662214792|ref|XP_008481243.1|	PREDICTED: allergen Cr-PI-like [Diaphorina citri]	PREDICTED: transcription factor E2F4 [Diaphorina citri]	794	1	45	1	LNHK[325.13]SFNYR_YAAENLEVK[325.13]QKR	101814_CLasBDP004_F121314_4hr_1.pep.xml.react2.xls
6264	4439.9	4439.91	1375.64	2312.86	1374.63	2312.85	1.0072	LNHK[325.13]SFNYR	MNNMNNK[325.13]MNMMDNNMNR	0	0	LNHKSFNYR	MNNMNNKMNMMDNNMNR	6267	6268	gi|662208685|ref|XP_008477906.1|	gi|662224569|ref|XP_008486634.1|	PREDICTED: allergen Cr-PI-like [Diaphorina citri]	PREDICTED: putative uncharacterized protein DDB_G0286901, partial [Diaphorina citri]	794	1	122	2	LNHK[325.13]SFNYR_MNNMNNK[325.13]MNMMDNNMNR	101814_CLasBDP004_F121314_4hr_1.pep.xml.react2.xls
7711	5202.4	5203.38	1259.57	3191.43	1259.57	3188.42	3.0044	NYK[325.13]AFQHR	QAMNGNQPFLYNLNK[325.13]M[147.04]NNNAPC[160.03]GIPR	0.0012361	0.0012361	NYKAFQHR	QAMNGNQPFLYNLNKMNNNAPCGIPR	7714	7715	gi|662208685|ref|XP_008477906.1|	gi|662208685|ref|XP_008477906.1|	PREDICTED: allergen Cr-PI-like [Diaphorina citri]	PREDICTED: allergen Cr-PI-like [Diaphorina citri]	785	1	893	1	NYK[325.13]AFQHR_QAMNGNQPFLYNLNK[325.13]M[147.04]NNNAPC[160.03]GIPR	101814_CLasBDP004_F121314_1.pep.xml.react2.xls
7753	5316.44	5316.45	1374.63	3190.41	1374.63	3188.42	1.9844	LNHK[325.13]SFNYR	QAMNGNQPFLYNLNK[325.13]M[147.04]NNNAPC[160.03]GIPR	0.0012361	0.018848	LNHKSFNYR	QAMNGNQPFLYNLNKMNNNAPCGIPR	7756	7757	gi|662208685|ref|XP_008477906.1|	gi|662208685|ref|XP_008477906.1|	PREDICTED: allergen Cr-PI-like [Diaphorina citri]	PREDICTED: allergen Cr-PI-like [Diaphorina citri]	794	1	893	1	LNHK[325.13]SFNYR_QAMNGNQPFLYNLNK[325.13]M[147.04]NNNAPC[160.03]GIPR	101814_CLasBDP004_F121314_1.pep.xml.react2.xls
8110	5202.4	5202.45	1259.57	3191.42	1259.57	3188.42	3.0038	NYK[325.13]AFQHR	QAM[147.04]NGNQPFLYNLNK[325.13]MNNNAPC[160.03]GIPR	0	0.009122	NYKAFQHR	QAMNGNQPFLYNLNKMNNNAPCGIPR	8113	8114	gi|662208685|ref|XP_008477906.1|	gi|662208685|ref|XP_008477906.1|	PREDICTED: allergen Cr-PI-like [Diaphorina citri]	PREDICTED: allergen Cr-PI-like [Diaphorina citri]	785	1	893	1	NYK[325.13]AFQHR_QAM[147.04]NGNQPFLYNLNK[325.13]MNNNAPC[160.03]GIPR	101814_CLasBDP004_F121314_4hr_1.pep.xml.react2.xls
8116	5201.36	5201.38	1259.57	3190.39	1259.57	3188.42	1.9676	NYK[325.13]AFQHR	QAM[147.04]NGNQPFLYNLNK[325.13]MNNNAPC[160.03]GIPR	0	0.0012361	NYKAFQHR	QAMNGNQPFLYNLNKMNNNAPCGIPR	8117	8118	gi|662208685|ref|XP_008477906.1|	gi|662208685|ref|XP_008477906.1|	PREDICTED: allergen Cr-PI-like [Diaphorina citri]	PREDICTED: allergen Cr-PI-like [Diaphorina citri]	785	1	893	1	NYK[325.13]AFQHR_QAM[147.04]NGNQPFLYNLNK[325.13]MNNNAPC[160.03]GIPR	101814_CLasBDP004_F121314_4hr_1.pep.xml.react2.xls
8122	5316.43	5316.47	1374.63	3190.39	1374.63	3188.42	1.9678	LNHK[325.13]SFNYR	QAM[147.04]NGNQPFLYNLNK[325.13]MNNNAPC[160.03]GIPR	0	0.010169	LNHKSFNYR	QAMNGNQPFLYNLNKMNNNAPCGIPR	8125	8124	gi|662208685|ref|XP_008477906.1|	gi|662208685|ref|XP_008477906.1|	PREDICTED: allergen Cr-PI-like [Diaphorina citri]	PREDICTED: allergen Cr-PI-like [Diaphorina citri]	794	1	893	1	LNHK[325.13]SFNYR_QAM[147.04]NGNQPFLYNLNK[325.13]MNNNAPC[160.03]GIPR	101814_CLasBDP004_F121314_1.pep.xml.react2.xls
8140	5317.46	5317.47	1374.64	3191.42	1374.63	3188.42	3.0054	LNHK[325.13]SFNYR	QAMNGNQPFLYNLNK[325.13]M[147.04]NNNAPC[160.03]GIPR	0	0.0012361	LNHKSFNYR	QAMNGNQPFLYNLNKMNNNAPCGIPR	8143	8142	gi|662208685|ref|XP_008477906.1|	gi|662208685|ref|XP_008477906.1|	PREDICTED: allergen Cr-PI-like [Diaphorina citri]	PREDICTED: allergen Cr-PI-like [Diaphorina citri]	794	1	893	1	LNHK[325.13]SFNYR_QAMNGNQPFLYNLNK[325.13]M[147.04]NNNAPC[160.03]GIPR	101814_CLasBDP004_F121314_1.pep.xml.react2.xls
8179	5201.39	5201.37	1259.57	3190.41	1259.57	3188.42	1.9935	NYK[325.13]AFQHR	QAMNGNQPFLYNLNK[325.13]M[147.04]NNNAPC[160.03]GIPR	0.0012361	0	NYKAFQHR	QAMNGNQPFLYNLNKMNNNAPCGIPR	8182	8183	gi|662208685|ref|XP_008477906.1|	gi|662208685|ref|XP_008477906.1|	PREDICTED: allergen Cr-PI-like [Diaphorina citri]	PREDICTED: allergen Cr-PI-like [Diaphorina citri]	785	1	893	1	NYK[325.13]AFQHR_QAMNGNQPFLYNLNK[325.13]M[147.04]NNNAPC[160.03]GIPR	101814_CLasBDP004_F121314_1.pep.xml.react2.xls
8187	5315.43	5315.42	1374.63	3189.39	1374.63	3188.42	0.9692	LNHK[325.13]SFNYR	QAMNGNQPFLYNLNK[325.13]M[147.04]NNNAPC[160.03]GIPR	0.009122	0	LNHKSFNYR	QAMNGNQPFLYNLNKMNNNAPCGIPR	8188	8191	gi|662208685|ref|XP_008477906.1|	gi|662208685|ref|XP_008477906.1|	PREDICTED: allergen Cr-PI-like [Diaphorina citri]	PREDICTED: allergen Cr-PI-like [Diaphorina citri]	794	1	893	1	LNHK[325.13]SFNYR_QAMNGNQPFLYNLNK[325.13]M[147.04]NNNAPC[160.03]GIPR	101814_CLasBDP004_F121314_1.pep.xml.react2.xls
8291	5185.4	5185.41	1260.57	3173.42	1259.57	3172.43	1.9991	NYK[325.13]AFQHR	QAMNGNQPFLYNLNK[325.13]MNNNAPC[160.03]GIPR	0.0047393	0	NYKAFQHR	QAMNGNQPFLYNLNKMNNNAPCGIPR	8294	8295	gi|662208685|ref|XP_008477906.1|	gi|662208685|ref|XP_008477906.1|	PREDICTED: allergen Cr-PI-like [Diaphorina citri]	PREDICTED: allergen Cr-PI-like [Diaphorina citri]	785	1	893	1	NYK[325.13]AFQHR_QAMNGNQPFLYNLNK[325.13]MNNNAPC[160.03]GIPR	101814_CLasBDP004_F121314_1.pep.xml.react2.xls	060215_CLasBDP_percoll_5_6_1.pep.xml.react2.xls
8297	5299.48	5300.47	1374.63	3173.44	1374.63	3172.43	1.0135	LNHK[325.13]SFNYR	QAMNGNQPFLYNLNK[325.13]MNNNAPC[160.03]GIPR	0.0012361	0	LNHKSFNYR	QAMNGNQPFLYNLNKMNNNAPCGIPR	8298	8301	gi|662208685|ref|XP_008477906.1|	gi|662208685|ref|XP_008477906.1|	PREDICTED: allergen Cr-PI-like [Diaphorina citri]	PREDICTED: allergen Cr-PI-like [Diaphorina citri]	794	1	893	1	LNHK[325.13]SFNYR_QAMNGNQPFLYNLNK[325.13]MNNNAPC[160.03]GIPR	101814_CLasBDP004_F121314_1.pep.xml.react2.xls
8309	5299.49	5299.48	1374.64	3173.45	1374.63	3172.43	1.0251	LNHK[325.13]SFNYR	QAMNGNQPFLYNLNK[325.13]MNNNAPC[160.03]GIPR	0	0	LNHKSFNYR	QAMNGNQPFLYNLNKMNNNAPCGIPR	8312	8313	gi|662208685|ref|XP_008477906.1|	gi|662208685|ref|XP_008477906.1|	PREDICTED: allergen Cr-PI-like [Diaphorina citri]	PREDICTED: allergen Cr-PI-like [Diaphorina citri]	794	1	893	1	LNHK[325.13]SFNYR_QAMNGNQPFLYNLNK[325.13]MNNNAPC[160.03]GIPR	101814_CLasBDP004_F121314_1.pep.xml.react2.xls
8449	5301.45	5302.44	1374.63	3175.41	1374.63	3172.43	2.9872	LNHK[325.13]SFNYR	QAMNGNQPFLYNLNK[325.13]MNNNAPC[160.03]GIPR	0	0.017932	LNHKSFNYR	QAMNGNQPFLYNLNKMNNNAPCGIPR	8452	8451	gi|662208685|ref|XP_008477906.1|	gi|662208685|ref|XP_008477906.1|	PREDICTED: allergen Cr-PI-like [Diaphorina citri]	PREDICTED: allergen Cr-PI-like [Diaphorina citri]	794	1	893	1	LNHK[325.13]SFNYR_QAMNGNQPFLYNLNK[325.13]MNNNAPC[160.03]GIPR	101814_CLasBDP004_F121314_1.pep.xml.react2.xls
8455	5184.38	5184.42	1259.57	3173.41	1259.57	3172.43	0.9793	NYK[325.13]AFQHR	QAMNGNQPFLYNLNK[325.13]MNNNAPC[160.03]GIPR	0	0	NYKAFQHR	QAMNGNQPFLYNLNKMNNNAPCGIPR	8458	8457	gi|662208685|ref|XP_008477906.1|	gi|662208685|ref|XP_008477906.1|	PREDICTED: allergen Cr-PI-like [Diaphorina citri]	PREDICTED: allergen Cr-PI-like [Diaphorina citri]	785	1	893	1	NYK[325.13]AFQHR_QAMNGNQPFLYNLNK[325.13]MNNNAPC[160.03]GIPR	101814_CLasBDP004_F121314_1.pep.xml.react2.xls	060215_CLasBDP_percoll_5_6_1.pep.xml.react2.xls
8461	5301.46	5302.42	1374.63	3175.42	1374.63	3172.43	2.9922	LNHK[325.13]SFNYR	QAMNGNQPFLYNLNK[325.13]MNNNAPC[160.03]GIPR	0	0.0012361	LNHKSFNYR	QAMNGNQPFLYNLNKMNNNAPCGIPR	8464	8465	gi|662208685|ref|XP_008477906.1|	gi|662208685|ref|XP_008477906.1|	PREDICTED: allergen Cr-PI-like [Diaphorina citri]	PREDICTED: allergen Cr-PI-like [Diaphorina citri]	794	1	893	1	LNHK[325.13]SFNYR_QAMNGNQPFLYNLNK[325.13]MNNNAPC[160.03]GIPR	101814_CLasBDP004_F121314_1.pep.xml.react2.xls
8977	4287.08	4288.08	1374.63	2161.05	1374.63	2161.05	-0.0013	LNHK[325.13]SFNYR	QNM[147.04]VLLDK[325.13]FATQLQSGR	0.0012361	0	LNHKSFNYR	QNMVLLDKFATQLQSGR	8980	8981	gi|662208685|ref|XP_008477906.1|	gi|662208685|ref|XP_008477906.1|	PREDICTED: allergen Cr-PI-like [Diaphorina citri]	PREDICTED: allergen Cr-PI-like [Diaphorina citri]	794	1	841	1	LNHK[325.13]SFNYR_QNM[147.04]VLLDK[325.13]FATQLQSGR	101814_CLasBDP004_F121314_1.pep.xml.react2.xls
10158	4271.1	4271.08	1374.63	2145.06	1374.63	2145.05	0.006	LNHK[325.13]SFNYR	QNMVLLDK[325.13]FATQLQSGR	0	0.0047393	LNHKSFNYR	QNMVLLDKFATQLQSGR	10161	10162	gi|662208685|ref|XP_008477906.1|	gi|662208685|ref|XP_008477906.1|	PREDICTED: allergen Cr-PI-like [Diaphorina citri]	PREDICTED: allergen Cr-PI-like [Diaphorina citri]	794	1	841	1	LNHK[325.13]SFNYR_QNMVLLDK[325.13]FATQLQSGR	101814_CLasBDP004_F121314_1.pep.xml.react2.xls
10164	4271.09	4271.09	1374.63	2145.06	1374.63	2145.05	0.002	LNHK[325.13]SFNYR	QNMVLLDK[325.13]FATQLQSGR	0	0	LNHKSFNYR	QNMVLLDKFATQLQSGR	10167	10168	gi|662208685|ref|XP_008477906.1|	gi|662208685|ref|XP_008477906.1|	PREDICTED: allergen Cr-PI-like [Diaphorina citri]	PREDICTED: allergen Cr-PI-like [Diaphorina citri]	794	1	841	1	LNHK[325.13]SFNYR_QNMVLLDK[325.13]FATQLQSGR	101814_CLasBDP004_F121314_1.pep.xml.react2.xls
10224	4158.04	4158.04	1259.57	2147.06	1259.57	2145.05	2.0093	NYK[325.13]AFQHR	QNMVLLDK[325.13]FATQLQSGR	0	0	NYKAFQHR	QNMVLLDKFATQLQSGR	10227	10228	gi|662208685|ref|XP_008477906.1|	gi|662208685|ref|XP_008477906.1|	PREDICTED: allergen Cr-PI-like [Diaphorina citri]	PREDICTED: allergen Cr-PI-like [Diaphorina citri]	785	1	841	1	NYK[325.13]AFQHR_QNMVLLDK[325.13]FATQLQSGR	101814_CLasBDP004_F121314_1.pep.xml.react2.xls
10236	4273.1	4273.1	1374.63	2147.06	1374.63	2145.05	2.0059	LNHK[325.13]SFNYR	QNMVLLDK[325.13]FATQLQSGR	0	0	LNHKSFNYR	QNMVLLDKFATQLQSGR	10237	10240	gi|662208685|ref|XP_008477906.1|	gi|662208685|ref|XP_008477906.1|	PREDICTED: allergen Cr-PI-like [Diaphorina citri]	PREDICTED: allergen Cr-PI-like [Diaphorina citri]	794	1	841	1	LNHK[325.13]SFNYR_QNMVLLDK[325.13]FATQLQSGR	101814_CLasBDP004_F121314_1.pep.xml.react2.xls
10242	4156.03	4156.03	1259.57	2145.06	1259.57	2145.05	0.0044	NYK[325.13]AFQHR	QNMVLLDK[325.13]FATQLQSGR	0.012141	0	NYKAFQHR	QNMVLLDKFATQLQSGR	10245	10246	gi|662208685|ref|XP_008477906.1|	gi|662208685|ref|XP_008477906.1|	PREDICTED: allergen Cr-PI-like [Diaphorina citri]	PREDICTED: allergen Cr-PI-like [Diaphorina citri]	785	1	841	1	NYK[325.13]AFQHR_QNMVLLDK[325.13]FATQLQSGR	101814_CLasBDP004_F121314_1.pep.xml.react2.xls
10422	6937.26	6937.24	1839.85	4346	1839.85	4342.99	3.0134	FNQNGK[325.13]PLNAEQQR	SNIFPFDRPLK[325.13]QQNEFNTPNVNQNNAFQQYFC[160.03]AR	0	0	FNQNGKPLNAEQQR	SNIFPFDRPLKQQNEFNTPNVNQNNAFQQYFCAR	10425	10426	gi|662208685|ref|XP_008477906.1| +1	gi|662208689|ref|XP_008477908.1|	PREDICTED: allergen Cr-PI-like [Diaphorina citri]	PREDICTED: probable cyclin-dependent serine/threonine-protein kinase DDB_G0292550, partial [Diaphorina citri]	825	1	212	2	FNQNGK[325.13]PLNAEQQR_SNIFPFDRPLK[325.13]QQNEFNTPNVNQNNAFQQYFC[160.03]AR	101814_CLasBDP004_F11_4hr_1.pep.xml.react2.xls
11143	5378.69	5378.7	2146.04	2481.24	2145.05	2481.24	0.9904	QNMVLLDK[325.13]FATQLQSGR	VFIGPK[325.13]FNQNGKPLNAEQQR	0	0.0012361	QNMVLLDKFATQLQSGR	VFIGPKFNQNGKPLNAEQQR	11146	11147	gi|662208685|ref|XP_008477906.1|	gi|662208685|ref|XP_008477906.1| +1	PREDICTED: allergen Cr-PI-like [Diaphorina citri]	PREDICTED: allergen Cr-PI-like [Diaphorina citri]	841	1	819	1	QNMVLLDK[325.13]FATQLQSGR_VFIGPK[325.13]FNQNGKPLNAEQQR	101814_CLasBDP004_F121314_4hr_1.pep.xml.react2.xls
12181	6920.42	6920.41	3000.43	3168.59	3000.42	3167.57	1.0348	IK[325.13]TKQANNNNNENNNVGNSFVETIK	K[325.13]LGLAPSALENYQTMLRDPTFYMIAK	0	0.011074	IKTKQANNNNNENNNVGNSFVETIK	KLGLAPSALENYQTMLRDPTFYMIAK	12184	12183	gi|662208685|ref|XP_008477906.1|	gi|662208685|ref|XP_008477906.1|	PREDICTED: allergen Cr-PI-like [Diaphorina citri]	PREDICTED: allergen Cr-PI-like [Diaphorina citri]	434	1	527	1	IK[325.13]TKQANNNNNENNNVGNSFVETIK_K[325.13]LGLAPSALENYQTMLRDPTFYMIAK	101814_CLasBDP004_F121314_4hr_1.pep.xml.react2.xls
2571	3117.45	3117.45	989.408	1376.64	989.406	1374.63	2.0104	MNK[325.13]MNR	LNHK[325.13]SFNYR	0.00092678	0	MNKMNR	LNHKSFNYR	2574	2575	gi|662224569|ref|XP_008486634.1|	gi|662208685|ref|XP_008477906.1|	PREDICTED: putative uncharacterized protein DDB_G0286901, partial [Diaphorina citri]	PREDICTED: allergen Cr-PI-like [Diaphorina citri]	3	1	794	1	MNK[325.13]MNR_LNHK[325.13]SFNYR	060215_CLasBDP_percoll_3_4_1.pep.xml.react2.xls
2597	4911.27	4911.3	1259.57	2900.29	1259.57	2898.28	2.0205	NYK[325.13]AFQHR	QAQDAAAQGQHNFYAK[325.13]MHHAGHQR	0.00092678	0.015152	NYKAFQHR	QAQDAAAQGQHNFYAKMHHAGHQR	2600	2599	gi|662208685|ref|XP_008477906.1|	gi|662208685|ref|XP_008477906.1|	PREDICTED: allergen Cr-PI-like [Diaphorina citri]	PREDICTED: allergen Cr-PI-like [Diaphorina citri]	785	1	193	1	NYK[325.13]AFQHR_QAQDAAAQGQHNFYAK[325.13]MHHAGHQR	060215_CLasBDP_percoll_5_6_1.pep.xml.react2.xls
2655	3386.61	3386.61	1260.57	1374.63	1259.57	1374.63	1.0058	NYK[325.13]AFQHR	LNHK[325.13]SFNYR	0.00092678	0	NYKAFQHR	LNHKSFNYR	2658	2657	gi|662208685|ref|XP_008477906.1|	gi|662208685|ref|XP_008477906.1|	PREDICTED: allergen Cr-PI-like [Diaphorina citri]	PREDICTED: allergen Cr-PI-like [Diaphorina citri]	785	1	794	1	NYK[325.13]AFQHR_LNHK[325.13]SFNYR	060215_CLasBDP_percoll_3_4_1.pep.xml.react2.xls
2681	5026.32	5026.33	1374.63	2900.28	1374.63	2898.28	2.0113	LNHK[325.13]SFNYR	QAQDAAAQGQHNFYAK[325.13]MHHAGHQR	0	0	LNHKSFNYR	QAQDAAAQGQHNFYAKMHHAGHQR	2684	2685	gi|662208685|ref|XP_008477906.1|	gi|662208685|ref|XP_008477906.1|	PREDICTED: allergen Cr-PI-like [Diaphorina citri]	PREDICTED: allergen Cr-PI-like [Diaphorina citri]	794	1	193	1	LNHK[325.13]SFNYR_QAQDAAAQGQHNFYAK[325.13]MHHAGHQR	060215_CLasBDP_percoll_3_4_2.pep.xml.react2.xls
2792	3500.67	3500.66	1374.63	1374.63	1374.63	1374.63	0.0015	LNHK[325.13]SFNYR	LNHK[325.13]SFNYR	0	0	LNHKSFNYR	LNHKSFNYR	2794	2795	gi|662208685|ref|XP_008477906.1|	gi|662208685|ref|XP_008477906.1|	PREDICTED: allergen Cr-PI-like [Diaphorina citri]	PREDICTED: allergen Cr-PI-like [Diaphorina citri]	794	1	794	1	LNHK[325.13]SFNYR_LNHK[325.13]SFNYR	060215_CLasBDP_percoll_3_4_1.pep.xml.react2.xls
3576	4610.27	4610.27	1374.63	2484.23	1374.63	2481.24	2.9921	LNHK[325.13]SFNYR	VFIGPK[325.13]FNQNGKPLNAEQQR	0	0.011236	LNHKSFNYR	VFIGPKFNQNGKPLNAEQQR	3579	3578	gi|662208685|ref|XP_008477906.1|	gi|662208685|ref|XP_008477906.1| +1	PREDICTED: allergen Cr-PI-like [Diaphorina citri]	PREDICTED: allergen Cr-PI-like [Diaphorina citri]	794	1	819	1	LNHK[325.13]SFNYR_VFIGPK[325.13]FNQNGKPLNAEQQR	060215_CLasBDP_percoll_5_6_1.pep.xml.react2.xls
4469	5185.41	5186.4	1259.57	3174.44	1259.57	3172.43	2.0122	NYK[325.13]AFQHR	QAMNGNQPFLYNLNK[325.13]MNNNAPC[160.03]GIPR	0.00092678	0.00092678	NYKAFQHR	QAMNGNQPFLYNLNKMNNNAPCGIPR	4472	4473	gi|662208685|ref|XP_008477906.1|	gi|662208685|ref|XP_008477906.1|	PREDICTED: allergen Cr-PI-like [Diaphorina citri]	PREDICTED: allergen Cr-PI-like [Diaphorina citri]	785	1	893	1	NYK[325.13]AFQHR_QAMNGNQPFLYNLNK[325.13]MNNNAPC[160.03]GIPR	101814_CLasBDP004_F121314_1.pep.xml.react2.xls	060215_CLasBDP_percoll_5_6_1.pep.xml.react2.xls
2996	3522.65	3523.65	1374.63	1396.61	1374.63	1396.59	0.0258	LNHK[325.13]SFNYR	DSYK[325.13]ANPSYR	0	0.026639	LNHKSFNYR	DSYKANPSYR	2999	2998	gi|662208685|ref|XP_008477906.1|	gi|662203835|ref|XP_008475271.1|	PREDICTED: allergen Cr-PI-like [Diaphorina citri]	PREDICTED: cytochrome P450 6a2-like [Diaphorina citri]	794	1	218	1	LNHK[325.13]SFNYR_DSYK[325.13]ANPSYR	060215_CLasBDP_percoll_3_4_1.pep.xml.react2.xls
4986	3369.59	3369.61	1260.57	1357.61	1259.57	1357.62	0.9951	NYK[325.13]AFQHR	MSEDK[325.13]TPVVR	0	0.031133	NYKAFQHR	MSEDKTPVVR	4989	4990	gi|662208685|ref|XP_008477906.1|	gi|662193981|ref|XP_008469921.1|	PREDICTED: allergen Cr-PI-like [Diaphorina citri]	PREDICTED: Na(+)/H(+) exchange regulatory cofactor NHE-RF1-like [Diaphorina citri]	785	1	5	1	NYK[325.13]AFQHR_MSEDK[325.13]TPVVR	060215_CLasBDP_percoll_3_4_2.pep.xml.react2.xls
4323	3428.62	3429.61	1302.58	1374.64	1303.58	1374.63	-1.0023	RK[325.13]DIGDTM[147.04]R	LNHK[325.13]SFNYR	0.019105	0.00069204	RKDIGDTMR	LNHKSFNYR	4324	4327	gi|594436748|gb|EXU77773.1|	gi|662208685|ref|XP_008477906.1|	bifunctional phosphopantothenoylcysteine decarboxylase/phosphopantothenate synthase [Candidatus Liberibacter asiaticus]	PREDICTED: allergen Cr-PI-like [Diaphorina citri]	296	1	794	1	RK[325.13]DIGDTM[147.04]R_LNHK[325.13]SFNYR	060215_CLasBDP_percoll_5_6_2.pep.xml.react2.xls
3521	5041.3	5042.29	1374.63	2915.27	1374.63	2914.27	0.9956	LNHK[325.13]SFNYR	QAQDAAAQGQHNFYAK[325.13]M[147.04]HHAGHQR	0	0.0025575	LNHKSFNYR	QAQDAAAQGQHNFYAKMHHAGHQR	3524	3525	gi|662208685|ref|XP_008477906.1|	gi|662208685|ref|XP_008477906.1|	PREDICTED: allergen Cr-PI-like [Diaphorina citri]	PREDICTED: allergen Cr-PI-like [Diaphorina citri]	794	1	193	1	LNHK[325.13]SFNYR_QAQDAAAQGQHNFYAK[325.13]M[147.04]HHAGHQR	060215_CLasBDP_percoll_5_6_3.pep.xml.react2.xls
3990	5026.31	5027.3	1374.64	2900.26	1374.63	2900.26	0.0128	LNHK[325.13]SFNYR	DFYAASTSTPPC[160.03]SPSGDPVK[325.13]THPER	0.00069252	0.014031	LNHKSFNYR	DFYAASTSTPPCSPSGDPVKTHPER	3993	3994	gi|662208685|ref|XP_008477906.1|	gi|662187021|ref|XP_008485042.1|	PREDICTED: allergen Cr-PI-like [Diaphorina citri]	PREDICTED: 5'-AMP-activated protein kinase catalytic subunit alpha-2-like [Diaphorina citri]	794	1	403	1	LNHK[325.13]SFNYR_DFYAASTSTPPC[160.03]SPSGDPVK[325.13]THPER	060215_CLasBDP_percoll_5_6_3.pep.xml.react2.xls
4549	3368.58	3369.58	1259.57	1357.61	1259.57	1358.6	-0.9926	NYK[325.13]AFQHR	FPPQESK[325.13]SDK	0	0.028744	NYKAFQHR	FPPQESKSDK	4552	4553	gi|662208685|ref|XP_008477906.1|	gi|662188253|ref|XP_008487791.1|	PREDICTED: allergen Cr-PI-like [Diaphorina citri]	PREDICTED: vigilin-like [Diaphorina citri]	785	1	243	1	NYK[325.13]AFQHR_FPPQESK[325.13]SDK	060215_CLasBDP_percoll_5_6_3.pep.xml.react2.xls
